# Supplementary material for: PKR activation by noncanonical ligands: a 5′-triphosphate requirement versus antisense contamination
Source: PubMed Central journal article supplement — RNA. 2019 Sep;25(9):1192–201. doi: 10.1261/rna.071910.119 (PMC6800522; doi:10.1261/rna.071910.119), 2019-09
Supplement: supp_071910.119_Supplemental_Figure_S1.pdf [file supp_071910.119_Supplemental_Figure_S1.pdf]

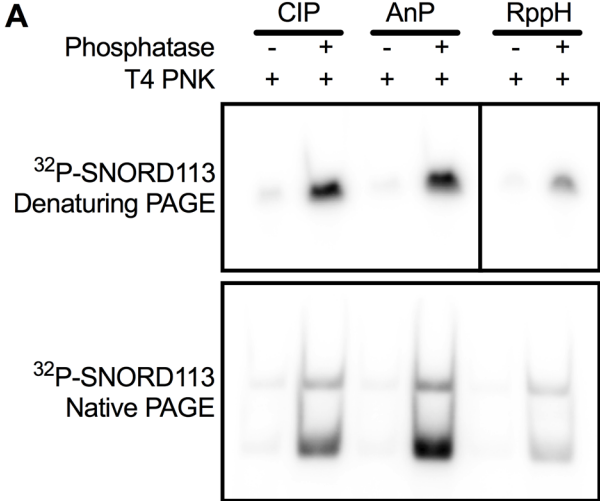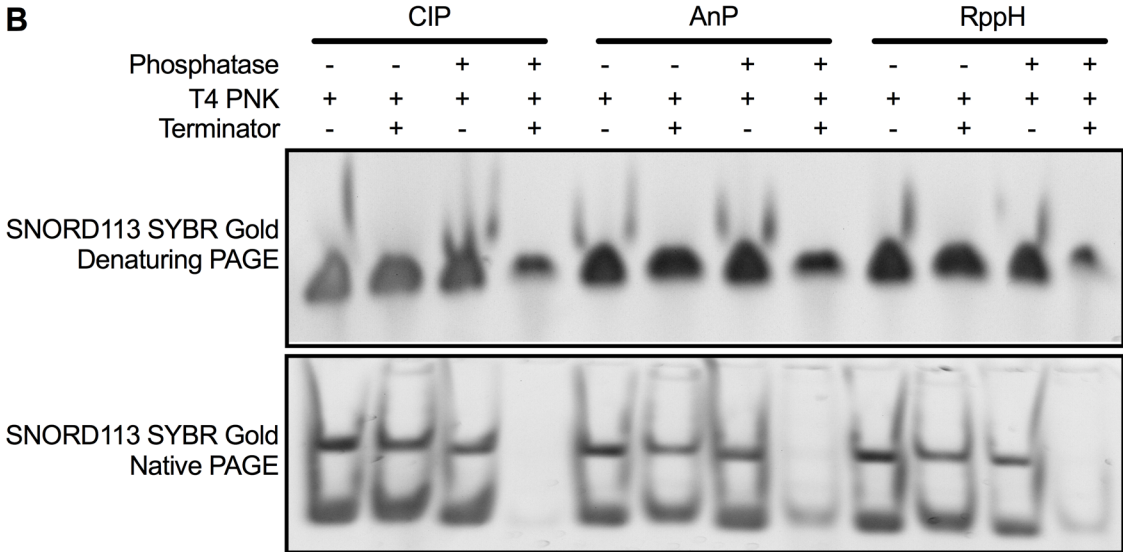

**Supplemental Figure S1.** Enzymatic confirmation of 5'-ppp modifications.

A) PhosphorImage of SNORD113 samples after mock or phosphatase treatment followed by T4 PNK treatment in the presence of [ $\gamma$ - $^{32}$ P]ATP. An aliquot of each RNA sample was run on a denaturing or native PAGE (8%). B) PAGE analysis of SNORD113 samples after mock or phosphatase treatment, T4 PNK treatment, and finally mock or Terminator treatment. SNORD113 samples were run on a denaturing and native PAGE (8%) and stained with SYBR Gold to visualize the RNA.
