# Supplementary material for: PKR activation by noncanonical ligands: a 5′-triphosphate requirement versus antisense contamination
Source: PubMed Central journal article supplement — RNA. 2019 Sep;25(9):1192–201. doi: 10.1261/rna.071910.119 (PMC6800522; doi:10.1261/rna.071910.119), 2019-09
Supplement: supp_071910.119_Supplemental_Figure_S2.pdf [file supp_071910.119_Supplemental_Figure_S2.pdf]

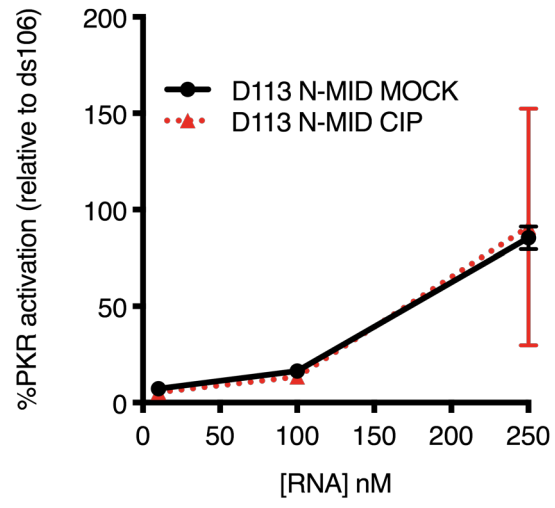

**Supplemental Figure S2.** Direct comparison of PKR activation with mock and CIP treated SNORD113 N-Mid samples. Data also appear in Figure 5, but here are plotted on the same graph. SNORD113 concentrations: 10 nM, 100 nM, 250 nM. Activation data were normalized to ds106 and averaged values plotted. Error bars  $\pm$ SD; n=3.
