# Supplementary material for: PKR activation by noncanonical ligands: a 5′-triphosphate requirement versus antisense contamination
Source: PubMed Central journal article supplement — RNA. 2019 Sep;25(9):1192–201. doi: 10.1261/rna.071910.119 (PMC6800522; doi:10.1261/rna.071910.119), 2019-09
Supplement: supp_071910.119_Supplemental_Figure_S3.pdf [file supp_071910.119_Supplemental_Figure_S3.pdf]

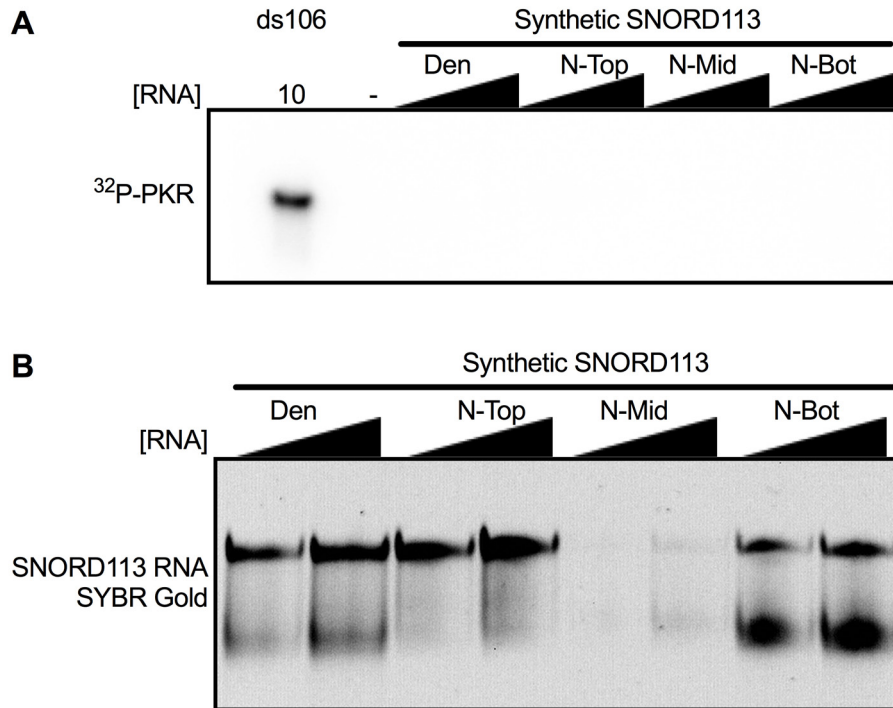

**Supplemental Figure S3.** Synthetic SNORD113 does not contain an N-Mid equivalent species. Synthetic SNORD113 species were gel purified after either 8% denaturing PAGE (Den) or 8% native-PAGE (N-Top, N-Mid, N-Bot) prior to the following experiments. A) Representative PhosphorImage of an autophosphorylation assay with synthetic SNORD113 Den, N-Mid, N-Bot, 100 nM, 500 nM, 1000 nM; N-Mid 1 nM, 10 nM, 50 nM; ds106, 10 nM. B) 8% native PAGE analysis of gel-purified synthetic SNORD113 species stained with SYBR Gold. n=2.
