# Supplementary material for: PKR activation by noncanonical ligands: a 5′-triphosphate requirement versus antisense contamination
Source: PubMed Central journal article supplement — RNA. 2019 Sep;25(9):1192–201. doi: 10.1261/rna.071910.119 (PMC6800522; doi:10.1261/rna.071910.119), 2019-09
Supplement: supp_071910.119_Supplemental_Figure_S4.pdf [file supp_071910.119_Supplemental_Figure_S4.pdf]

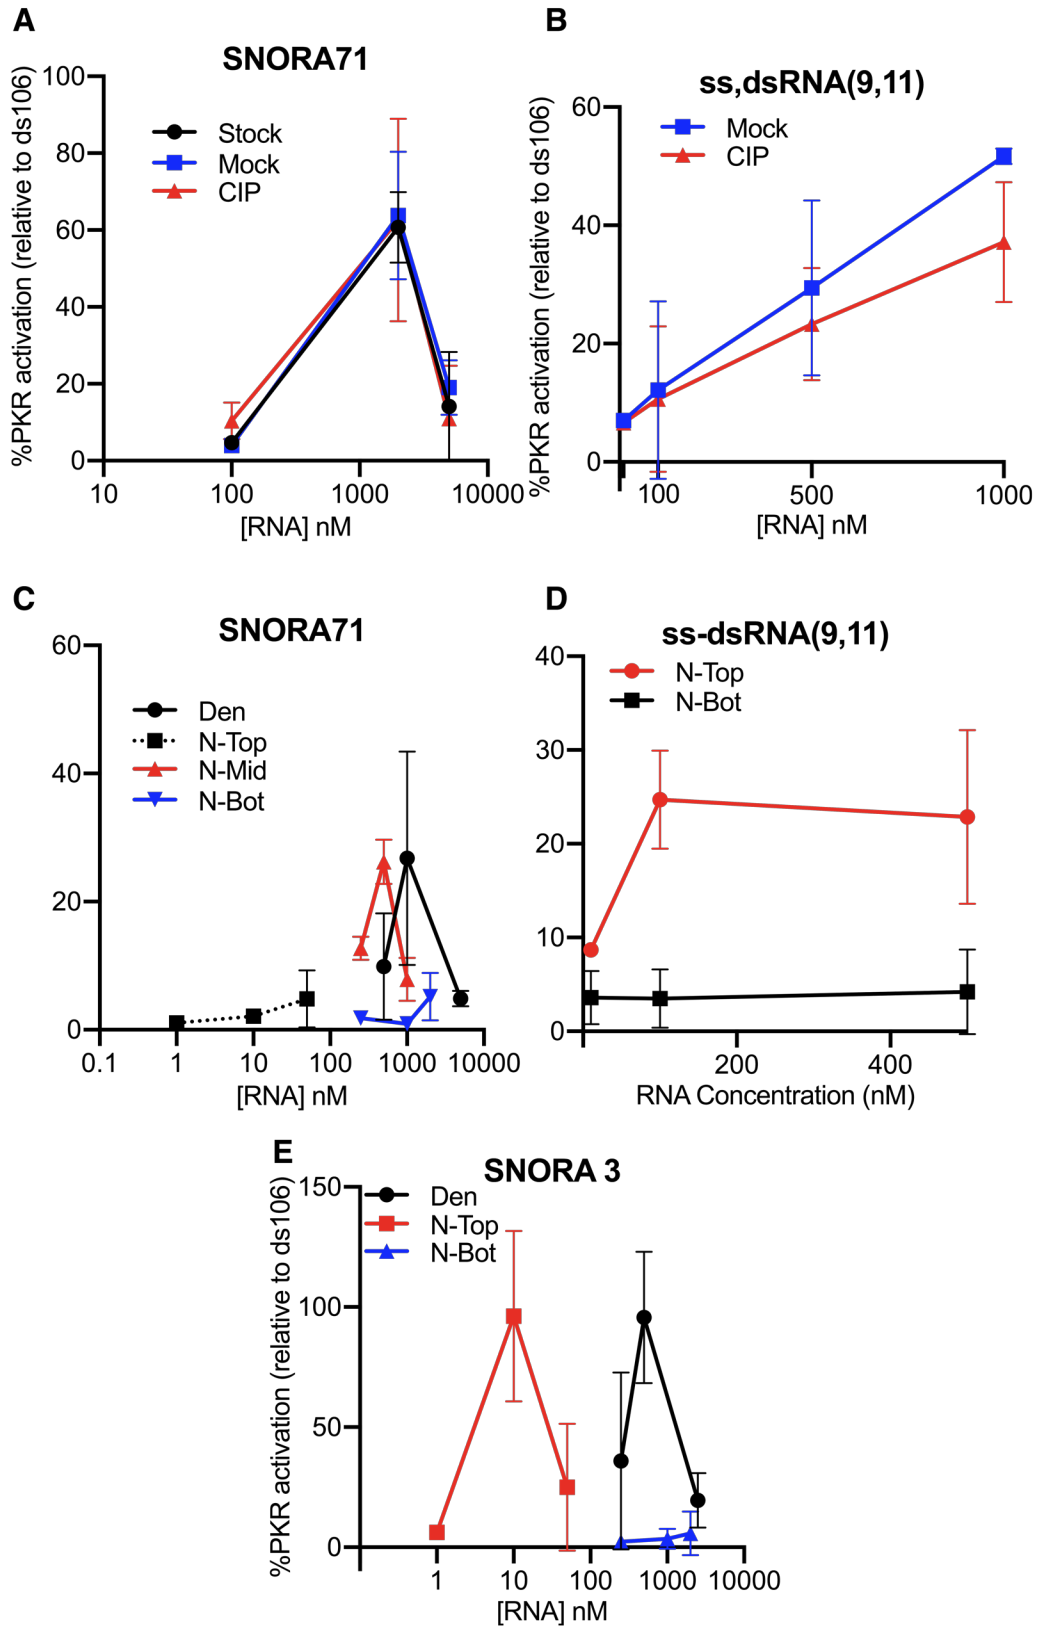

**Supplemental Figure S4.** Native gel-purification, not CIP treatment, affects PKR activation by various noncanonical substrate RNAs. Data are plotted as %average activation (n=3) using activation by 10 nM ds106 as 100%; error bars  $\pm$ SD. A different snoRNA, SNORA71 (A), as well as a previously tested RNA, ss-dsRNA(9,11) (Nallagatla et al. 2007) (B), show triphosphate-independent activation. For these RNAs (C and D) as well as SNORA3 (E), purification from a native gel revealed conformation specific activation. For each native purified RNA, the minor activating species is plotted in red.
