# Supplementary material for: PKR activation by noncanonical ligands: a 5′-triphosphate requirement versus antisense contamination
Source: PubMed Central journal article supplement — RNA. 2019 Sep;25(9):1192–201. doi: 10.1261/rna.071910.119 (PMC6800522; doi:10.1261/rna.071910.119), 2019-09
Supplement: supp_071910.119_Supplemental_Figure_S5.pdf [file supp_071910.119_Supplemental_Figure_S5.pdf]

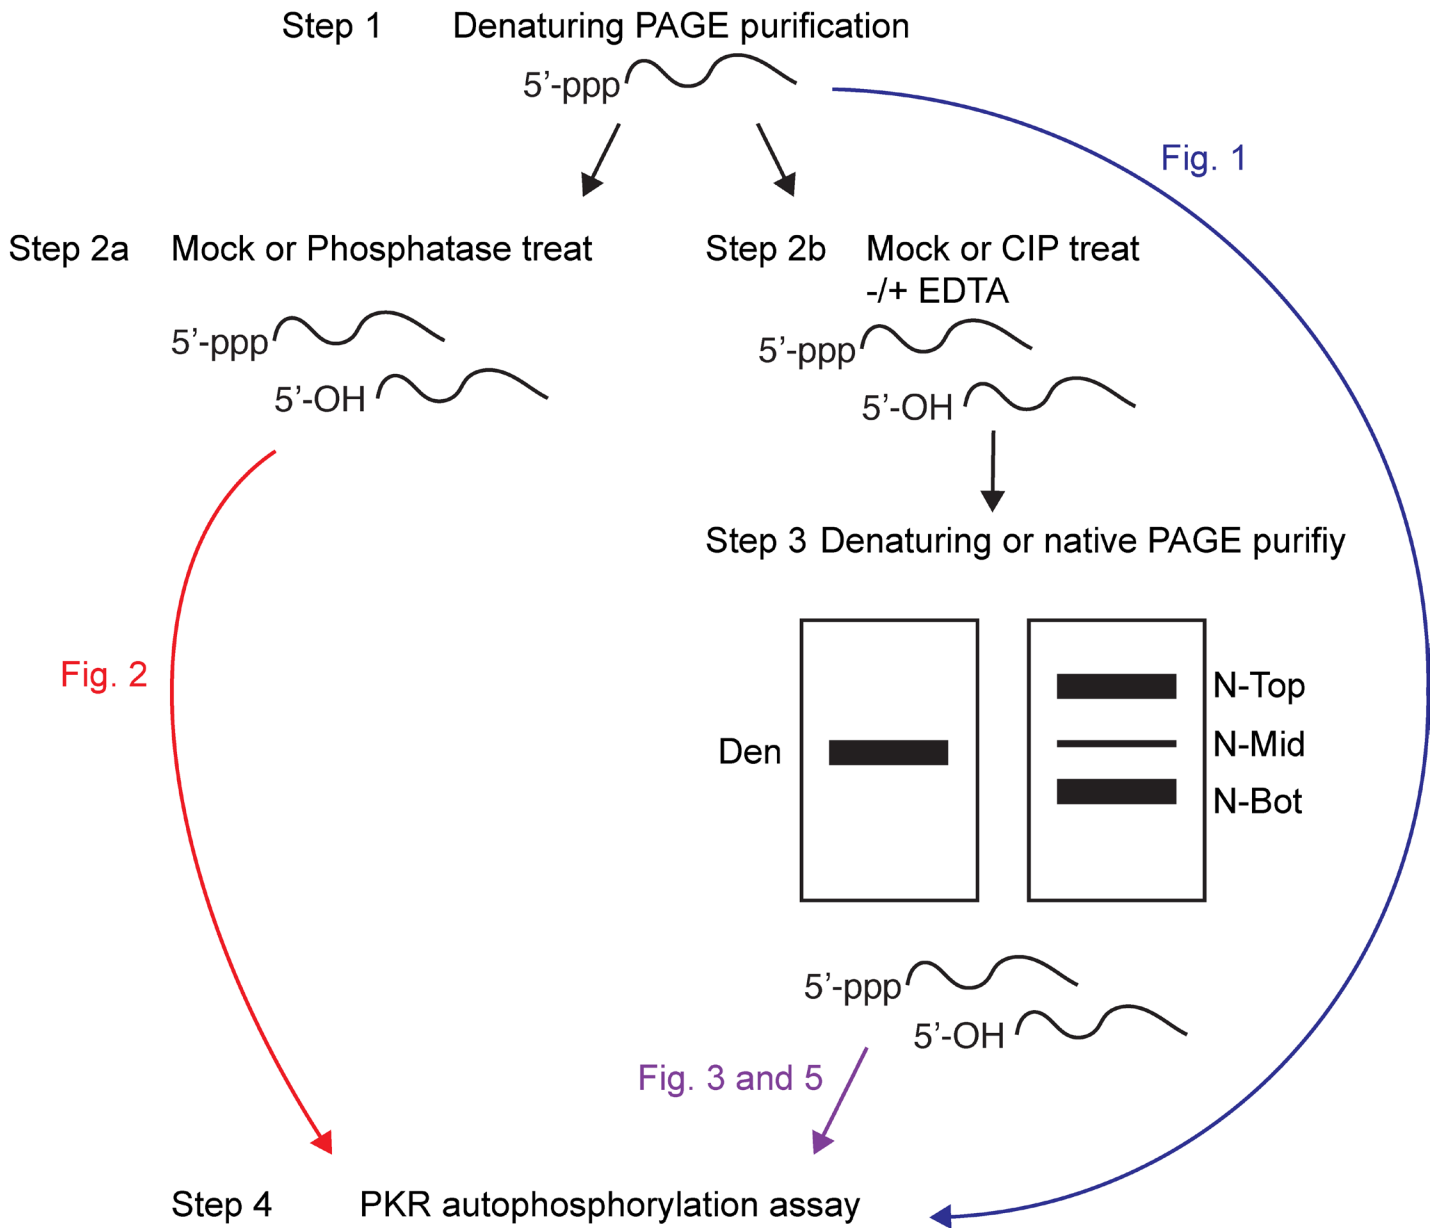

**Supplemental Figure S5.** Step 1) Every RNA used in this study was first gel-purified after denaturing PAGE. RNA in Fig. 1 was used in PKR autophosphorylation assays directly after Step 1. Step 2a) RNA was mock or phosphatase treated. Enzymes were removed by Phenol-Chloroform extraction. RNA in Fig. 2 was used in PKR autophosphorylation assays after step 2a. Step 2b) RNA was mock or CIP treated. EDTA or water was added to the reaction, and enzymes were removed by Phenol-Chloroform extraction. Step 3) RNA was purified again after denaturing or native PAGE. RNA in Fig. 3 and Fig 5 were used in PKR autophosphorylation assays after Step 2b and Step 3.
