# Supplementary material for: PKR activation by noncanonical ligands: a 5′-triphosphate requirement versus antisense contamination
Source: PubMed Central journal article supplement — RNA. 2019 Sep;25(9):1192–201. doi: 10.1261/rna.071910.119 (PMC6800522; doi:10.1261/rna.071910.119), 2019-09
Supplement: supp_071910.119_Supplemental_Table_S1.pdf [file supp_071910.119_Supplemental_Table_S1.pdf]

Supplemental Table S1. Hydrodynamic properties and molecular weights of SNORD113 Den and N-Top

| <b>Sample</b> | <b>Monomer (MW<sup>a</sup>; s<sup>b</sup>; % of distribution)</b> | <b>Dimer (MW<sup>a</sup>; s<sup>b</sup>; % of distribution)</b> | <b>Tetramer (MW<sup>a</sup>; s<sup>b</sup>; % of distribution)</b> | <b>RMS<sup>c</sup></b> |
|---------------|-------------------------------------------------------------------|-----------------------------------------------------------------|--------------------------------------------------------------------|------------------------|
| <b>Den</b>    | 28,108 Da; 3.46; 12%                                              | 48,379 Da; 4.97; 77%                                            | 91,586 Da; 7.60; 10%                                               | 0.004451               |
| <b>N-Top</b>  | 0%                                                                | 49,131 Da; 5.02; 72%                                            | 94,817 Da; 7.78; 24%                                               | 0.005124               |
| <b>N-Top</b>  | 28,610 Da; 3.50; 6%                                               | 48,290 Da; 4.96; 81%                                            | 80,323 Da; 6.96; 10%                                               | 0.004464               |

Parameters obtained by SEDFIT. All data were collected in AU200 buffer.

<sup>a</sup>MW, determined molecular weight

<sup>b</sup>s, uncorrected sedimentation coefficient (Svedbergs)

<sup>c</sup>RMS of the fit
