# Supplementary material for: PKR activation by noncanonical ligands: a 5′-triphosphate requirement versus antisense contamination
Source: PubMed Central journal article supplement — RNA. 2019 Sep;25(9):1192–201. doi: 10.1261/rna.071910.119 (PMC6800522; doi:10.1261/rna.071910.119), 2019-09
Supplement: supp_071910.119_Supplemental_Table_S2.pdf [file supp_071910.119_Supplemental_Table_S2.pdf]

Supplemental Table S2. Hydrodynamic properties and molecular weights of SNORD113 Den and N-Bot

| <b>Sample</b> | <b>Monomer (MW<sup>a</sup>; s<sup>b</sup>; % of distribution)</b> | <b>Dimer (MW<sup>a</sup>; s<sup>b</sup>; % of distribution)</b> | <b>Tetramer (MW<sup>a</sup>; s<sup>b</sup>; % of distribution)</b> | <b>RMS<sup>c</sup></b> |
|---------------|-------------------------------------------------------------------|-----------------------------------------------------------------|--------------------------------------------------------------------|------------------------|
| <b>Den</b>    | 29,347 Da; 3.56; 13%                                              | 48,832 Da; 5.00; 80%                                            | 90,857 Da; 7.56; 6%                                                | 0.004831               |
| <b>N-Bot</b>  | 28,451 Da; 3.49; 15%                                              | 48,771 Da; 5.04; 85%                                            | 0%                                                                 | 0.004494               |
| <b>N-Bot</b>  | 30,009 Da; 3.61; 14%                                              | 47,704 Da; 4.97; 83%                                            | 92,946 Da; 7.67; 3%                                                | 0.004464               |

Parameters obtained by SEDFIT. All data were collected in AU200 buffer.

<sup>a</sup>MW, determined molecular weight

<sup>b</sup>s, uncorrected sedimentation coefficient (Svedbergs)

<sup>c</sup>RMS of the fit
