# Supplementary material for: PKR activation by noncanonical ligands: a 5′-triphosphate requirement versus antisense contamination
Source: PubMed Central journal article supplement — RNA. 2019 Sep;25(9):1192–201. doi: 10.1261/rna.071910.119 (PMC6800522; doi:10.1261/rna.071910.119), 2019-09
Supplement: supp_071910.119_Supplemental_Table_S3.pdf [file supp_071910.119_Supplemental_Table_S3.pdf]

Supplemental Table S3. Sequences used in this study

| RNA                | Sequence*                                                                  |
|--------------------|----------------------------------------------------------------------------|
| SNORD113 sense     | GGGUUGGUUGAUGAUGACCACCGGUGGCAUUUGACUCAUCAUGAUGACUUUGAGUCUGAAACACCAAGAUCCAA |
| SNORD113 antisense | UUGGAUCUUGGUGUUUCAGACUCAAAAGUCAUCAUGUAUGAGUCAAAUGCCACCGGUGGUCAUCAACCAACCC  |
| ss-dsRNA(9,11)     | GGGAGAGAGGUCACUGACUAAGUUGGUGAAAUCUUGAUUUUAUCAGUGACAAGAAGGAAGG              |
| PCR primers        | Sequence*                                                                  |
| SNORD113 FOR T7    | TAATACGACTCACTATAGGGTTGGTTGATGATGACC                                       |
| SNORD113 FOR T3    | AATTAACCCTCACTAAAGGGTTGGTTGATGATGACC                                       |
| SNORD113 FOR SP6   | ATTTAGGTGACACTATAGGGTTGGTTGATGATGACC                                       |
| SNORD113 REV       | TTGGATCTTGGTGTTCAGACTC                                                     |
| ss-dsRNA(9,11) FOR | GCGCTAATACGACTCACTATAGG                                                    |
| ss-dsRNA(9,11) REV | CCTTCCTTCTTGACTG                                                           |
| Northern probes    | Sequence*                                                                  |
| SNORD113 sense     | GACTCAAAGTCATCATGTATGAGTCAAATG                                             |
| SNORD113 antisense | CATACATGATGACTTTGAGTCTGAAACACC                                             |

\* all sequences are written 5' to 3'
